# Supplementary material for: Cracking enabled unclonability in colloidal crystal patterns authenticated with computer vision
Source: Royal Society of Chemistry journal article supplement (doi:10.1039/d2nr01479c), 2022-01-01
Supplement: d2nr01479c1.pdf [file d2nr01479c1.pdf]

## Supporting Information for

### Cracking enabled unclonability in colloidal crystal patterns authenticated with computer vision

Yuhuan Li<sup>a</sup>, Yexin Mao<sup>b</sup>, Jiahui Wang<sup>a</sup>, Zhiwei Liu<sup>b</sup>, Pan Jia<sup>a</sup>, Na Wu<sup>a</sup>, Haitao Yu<sup>a</sup>, Jinqiao Wang<sup>b</sup>, Yanlin Song<sup>c</sup> and Jinming Zhou<sup>\*a</sup>

<sup>a</sup> Key Laboratory of Inorganic Nanomaterials of Hebei Province, College of Chemistry and Materials Science, Hebei Normal University, Shijiazhuang, 050024, P. R. China.

<sup>b</sup> National Laboratory of Pattern Recognition, Institute of Automation, Chinese Academy of Sciences, Beijing, 100190, P. R. China

<sup>c</sup> Key Laboratory of Green Printing, Institute of Chemistry, Chinese Academy of Sciences, Beijing, 100190, P. R. China.

\* Corresponding author (email: zhoujm@iccas.ac.cn, zhoujm@hebtu.edu.cn)

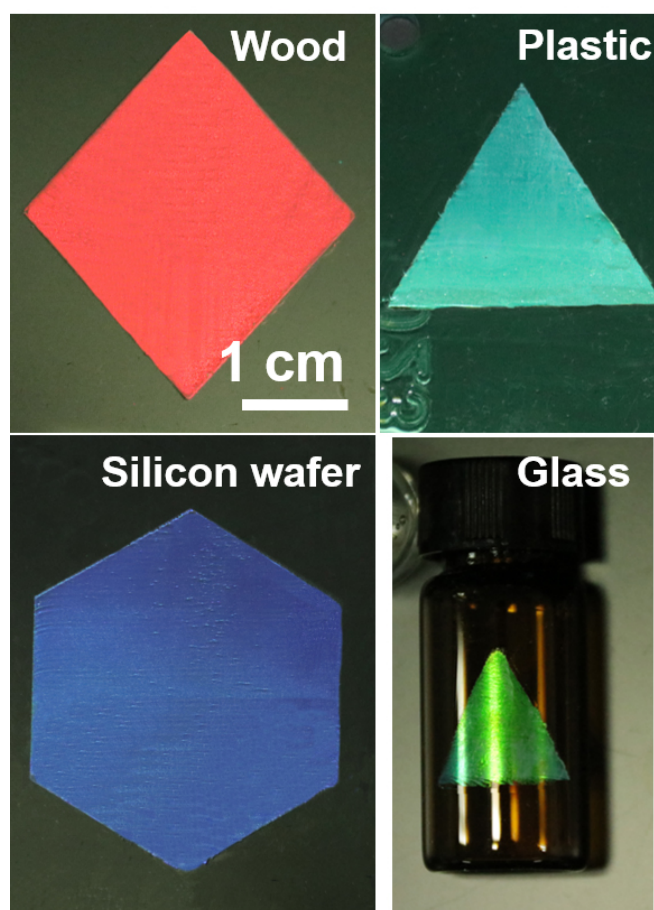

**Fig. S1.** Photos of the patterned colloidal crystal films assembled on wood, plastic silicon wafer and glass bottle surfaces.

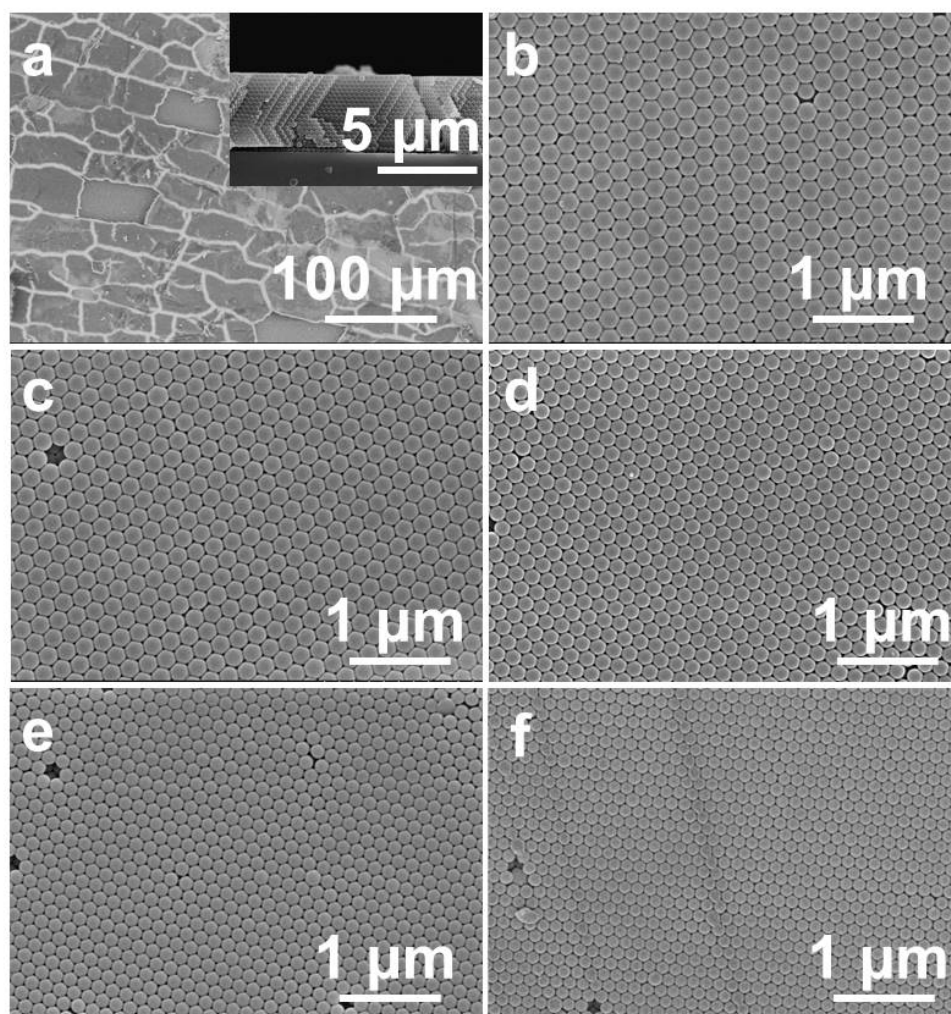

**Fig. S2.** SEM images of the colloidal crystal films assembled with monodisperse P(St-MMA-AA) particles of varying sizes to produce the rich color hues. The low magnification image showed obvious irregular micro-cracks and the high-resolution image demonstrated well-ordered periodic arrangement of the nanospheres. The inset in (a) shows the cross-sectional SEM image of the colloidal crystals.

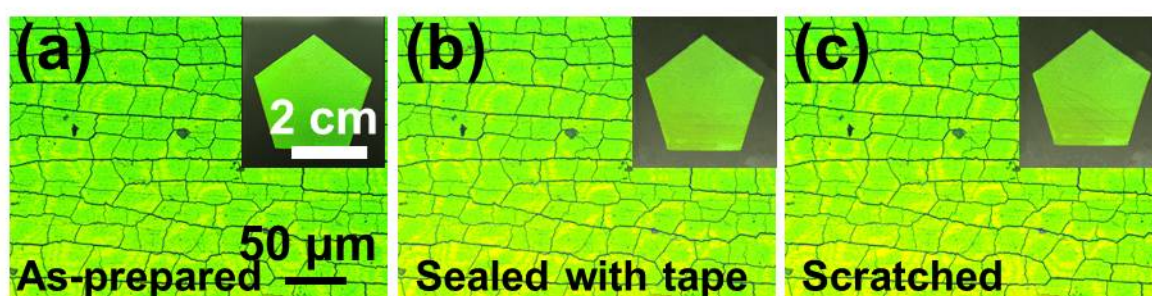

**Fig. S3.** Optical microscope images of the colloidal crystal patterns with PUF of (a) the as-prepared film, (b) after being covered with a transparent tape and (c) after being further scratched using a pencil. The insets are the corresponding photos of the colloidal-crystal films. The stability of the colloidal-crystal patterns with PUF could be improved by facily covering them with transparent tape, while not influencing the cracking “fingerprints” of the colloidal crystals.



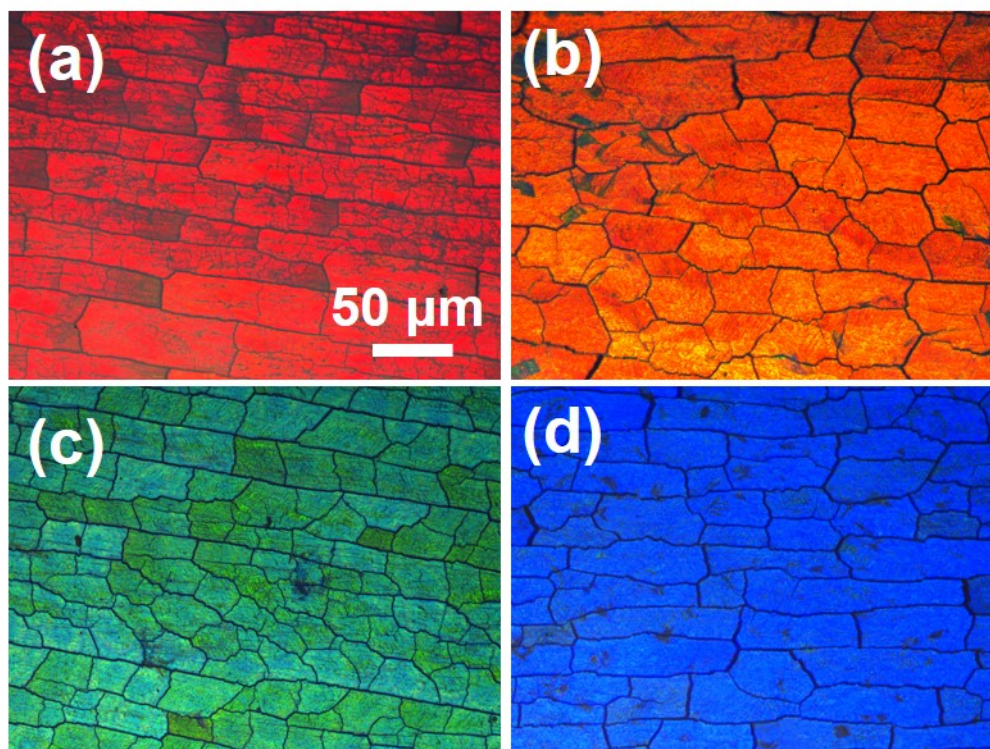

**Fig. S4.** Optical microscope images of the colloidal crystals with red (a), orange (b), cyan (c) and blue (d) structural colors.

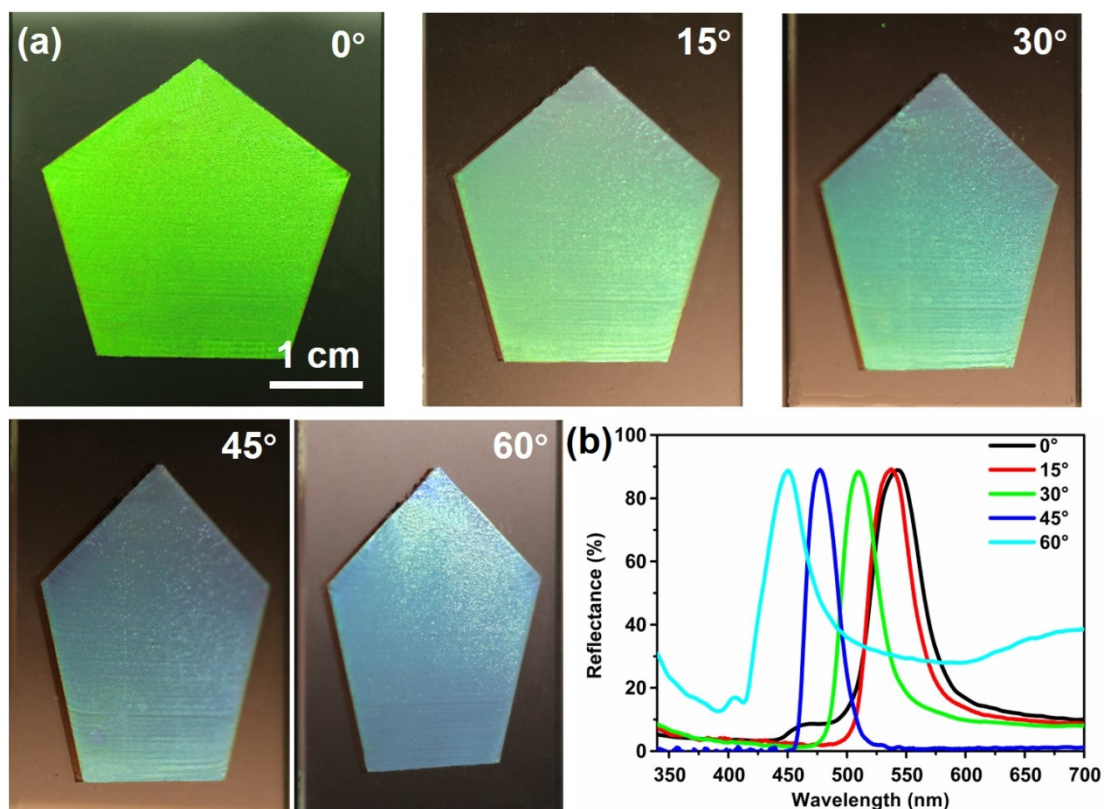

**Fig. S5.** (a) Digital photographs and (b) the reflectance spectra of the colloidal crystal film assembled with monodisperse P(St-MMA-AA) nanospheres with the size of  $\sim 228$  nm at viewing angles from  $0^\circ$  to  $60^\circ$ .



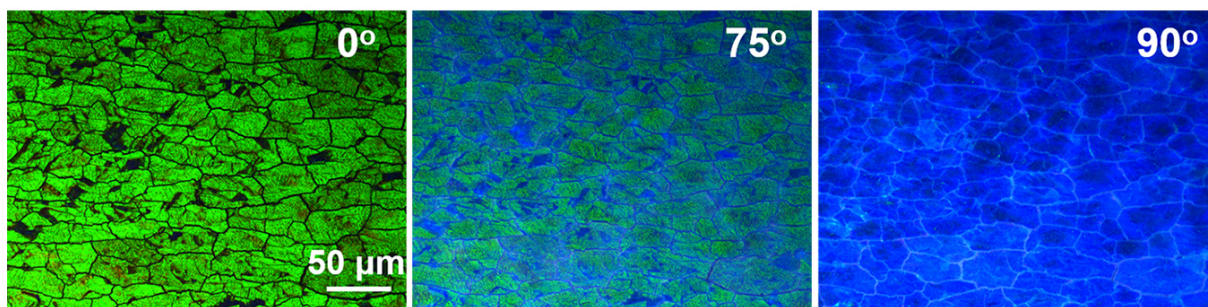

**Fig. S6.** Optical microscope images of the colloidal crystal film under cross-polarized light. Colloidal crystal film demonstrated polarization anisotropy.

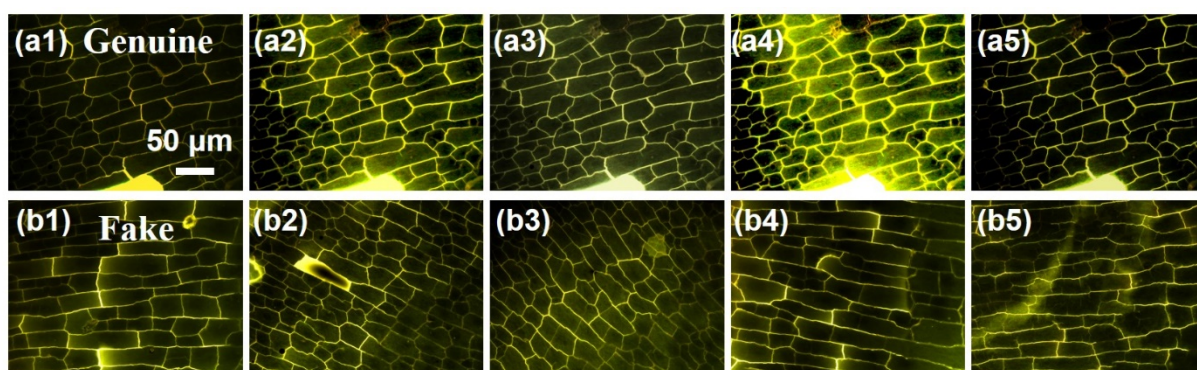

**Fig. S7.** Fluorescent optical microscope images of the colloidal crystals under UV light with varying photographing habits, the micro-crack edges of which were extracted to produce the samples for authentication of a(1-5) genuine samples (Fig 4c) and b(1-5) fake samples(Fig. 4d).

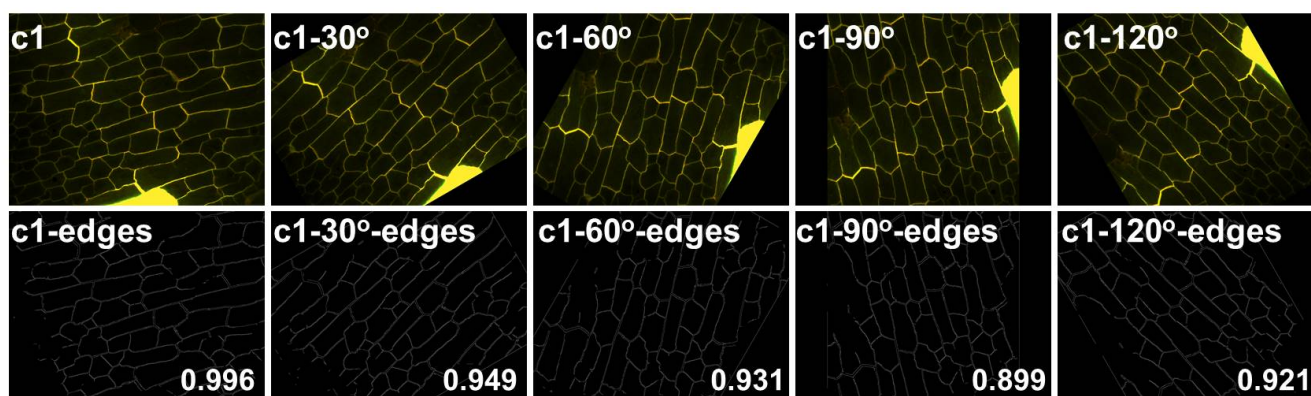

**Fig. S8.** Fluorescent optical microscope images of the colloidal crystals under UV light taken after being rotated every 30°, the micro-crack edges of which were extracted to produce the samples for validation test. The inset numbers indicate the identical rates with Fig. 4b1.
